# Supplementary material
Source: publisher site journal article supplement (https://www.dovepress.com/get_supplementary_file.php?f=486709.docx)
Supplement: Supplementary file 1 [file get_supplementary_file.php]

**Supplementary Figures：**

*
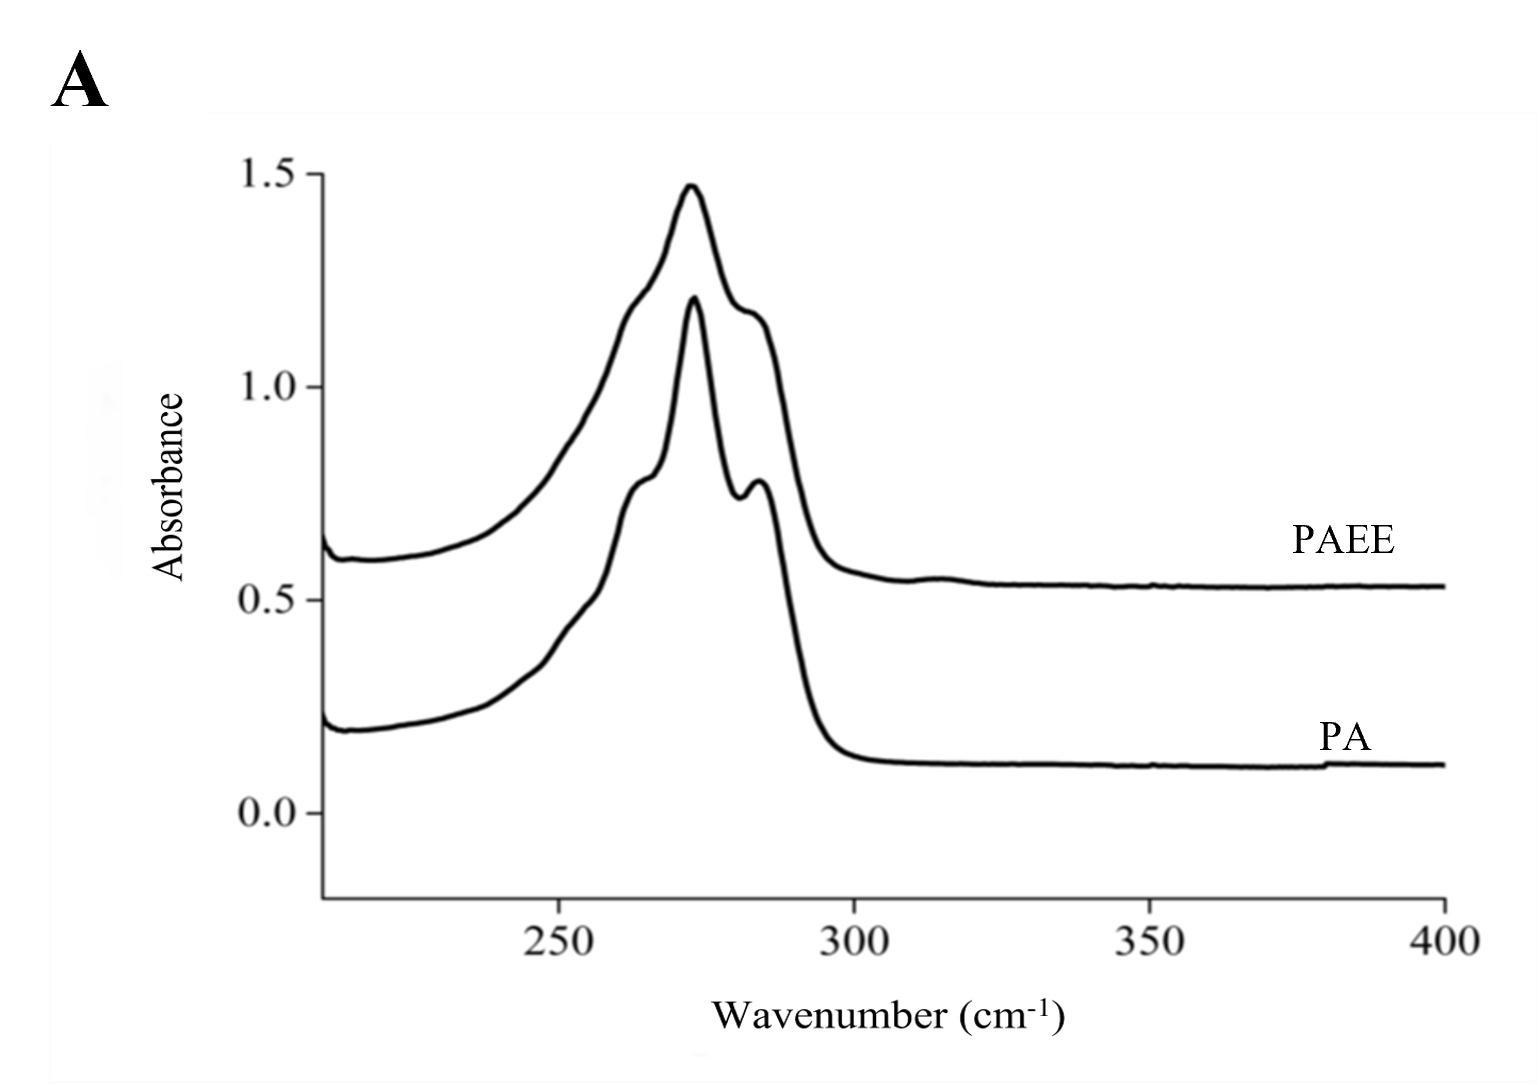

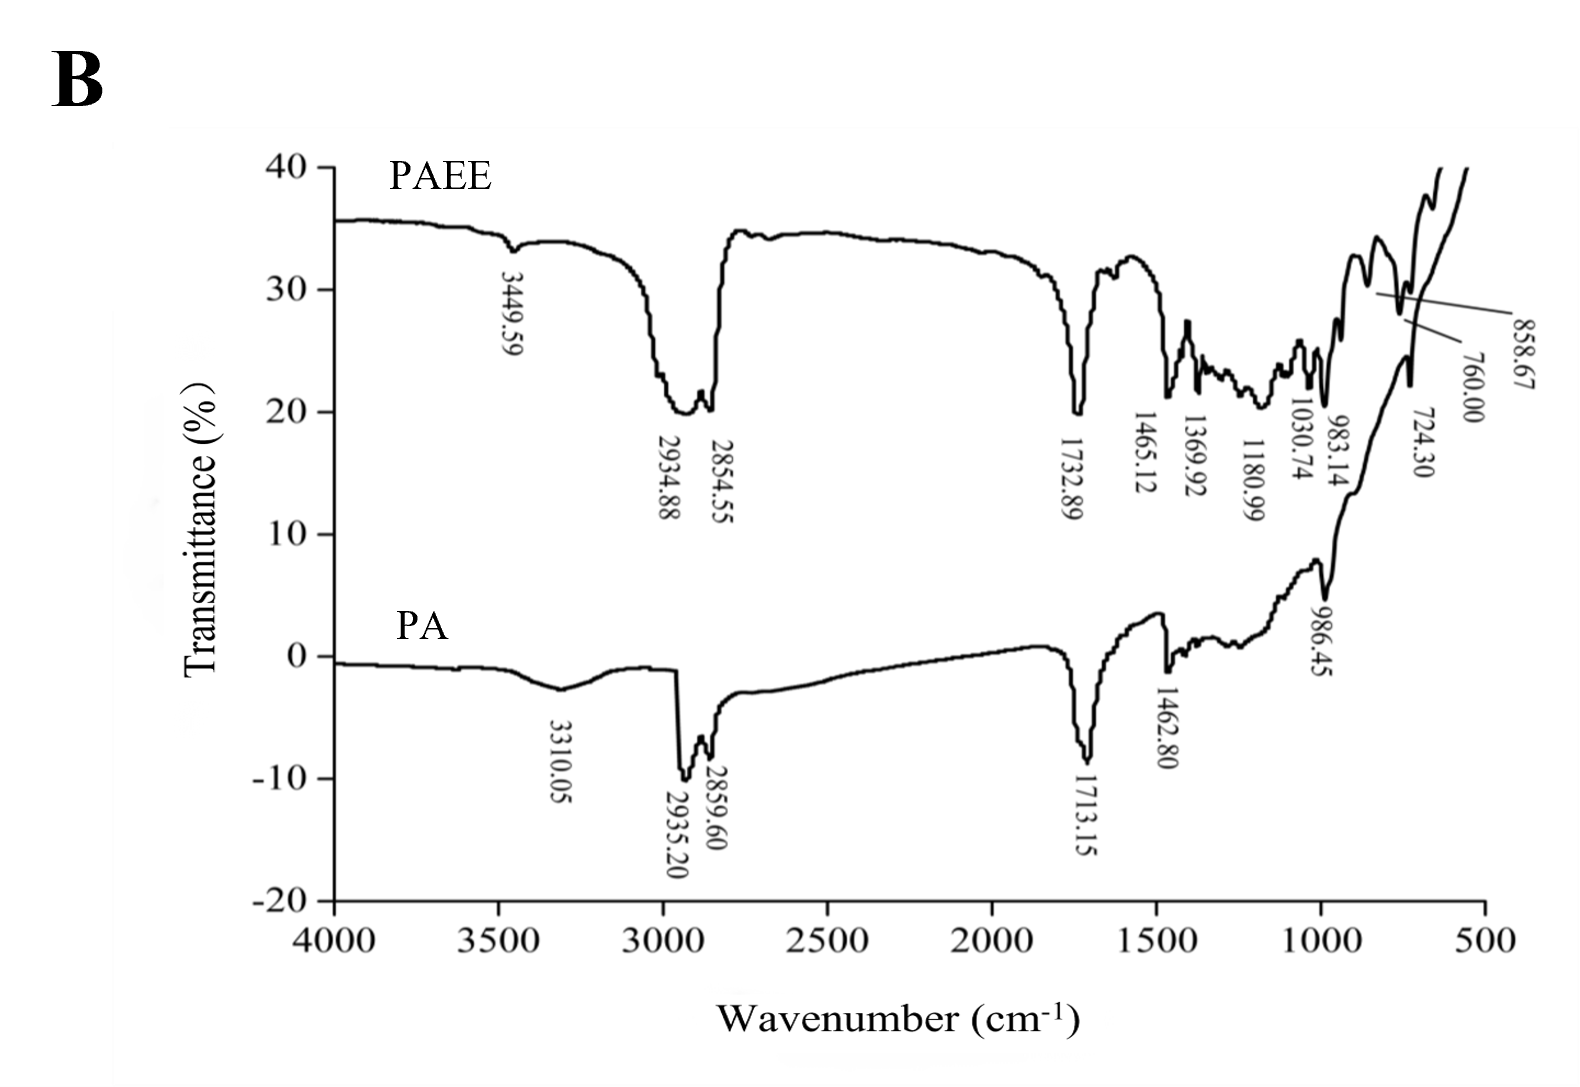
***Figure S1**.UV (A) and IR (B) spectra of PAEE and PA.

***
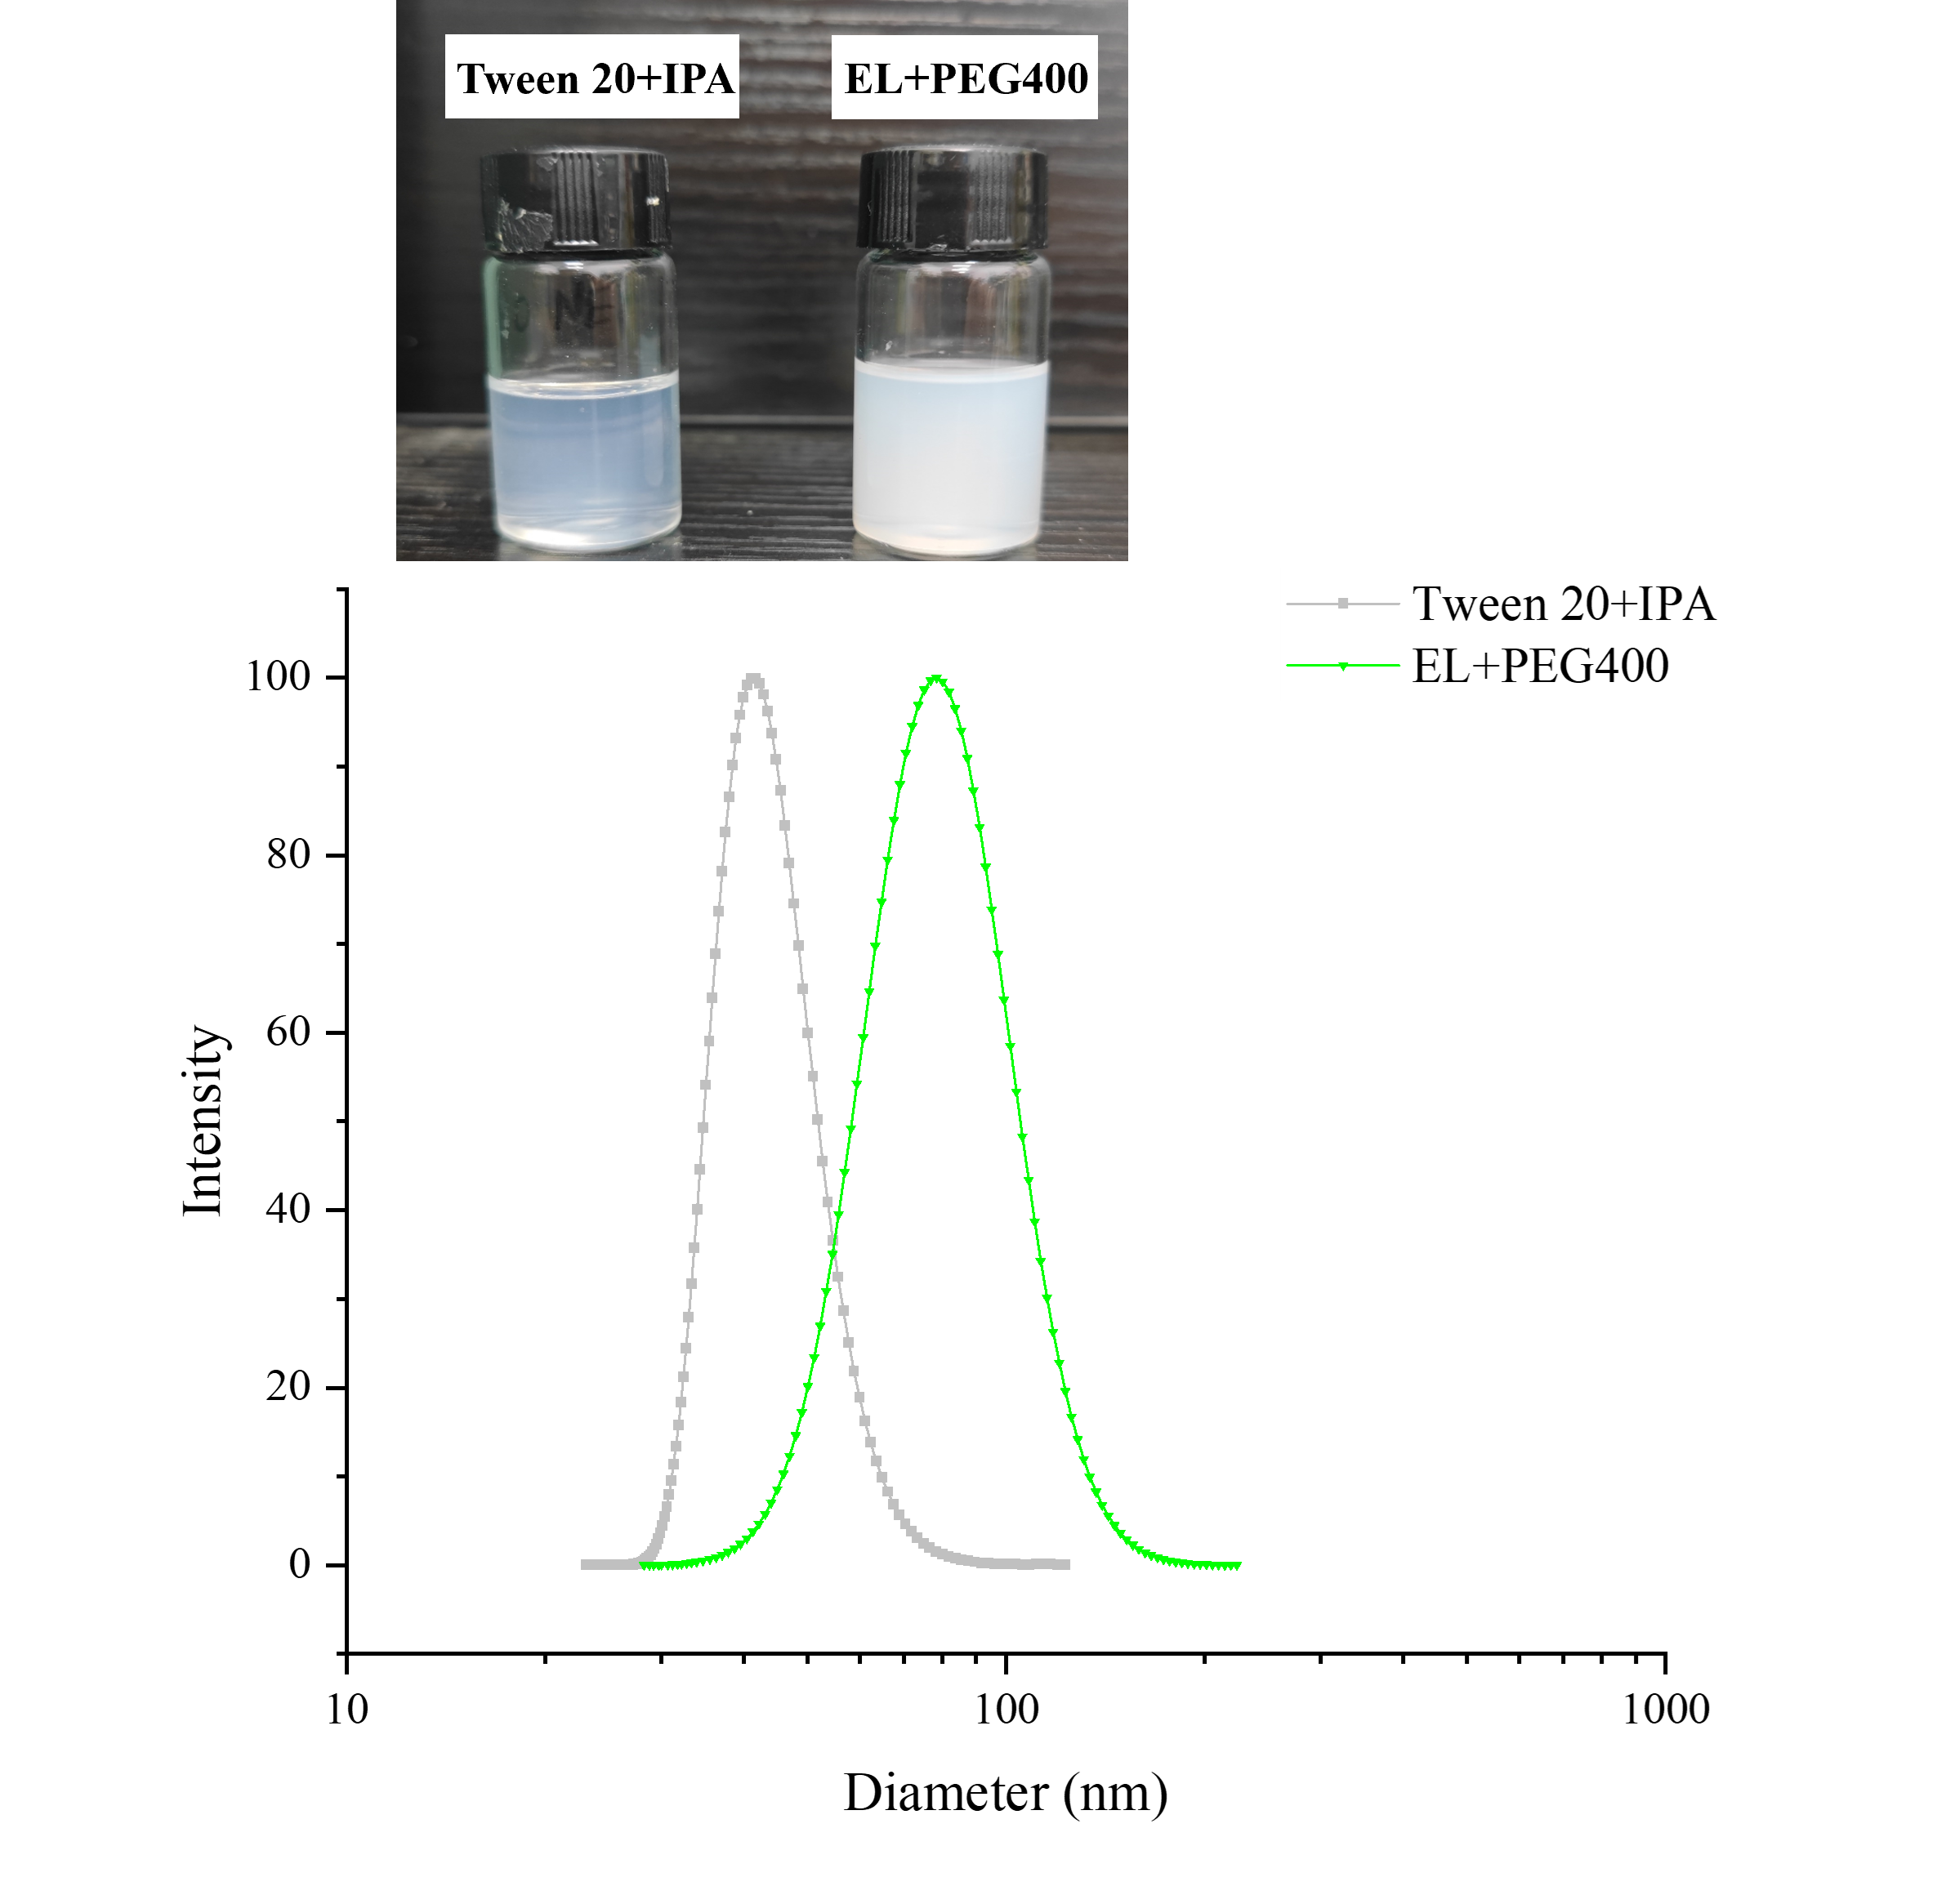
***

**Figure S2.** Appearance and particle size distribution of OA NE prepared with different emulsifiers.

**Abbreviations:** IPA, isopropanol; EL, Cremophor EL.

**Supplementary Materials：**

HLB = 16.7**W*T% + 4.3**W*S% (1)

where 16.7 and 4.3 represent the HLB value of Tween-20 and Span-80, respectively. *W*T% and *W*S% represent the weight proportion of Tween-20 and Span-80 in the total weight, respectively.
